# Supplementary material
Source: Springer Nature journal article supplement (https://www.springermedizin.de/resource/supplementary/12877_2013_952_MOESM2_ESM.pdf/9440780)

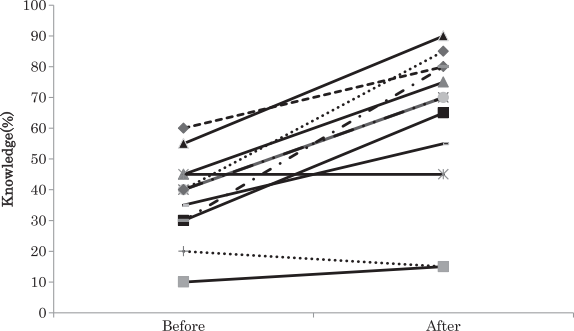

Supplement: MOESM2 [file 9440780]
